# Supplementary figures and images for: Macroecology of Dung Beetles in Italy
Source: MDPI journal article supplement (doi:10.3390/insects15010039), 2024-01-07

A

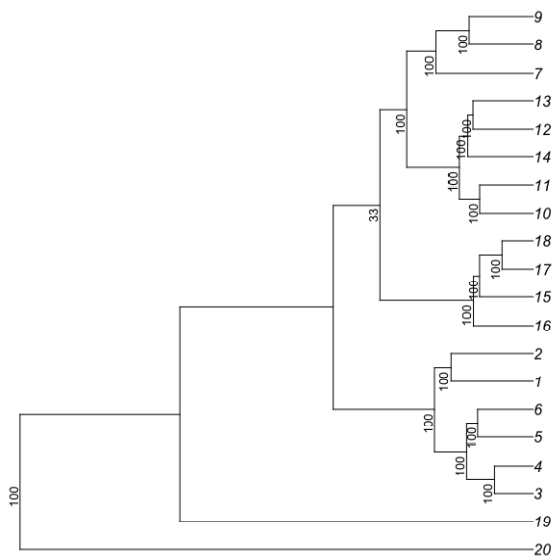

B

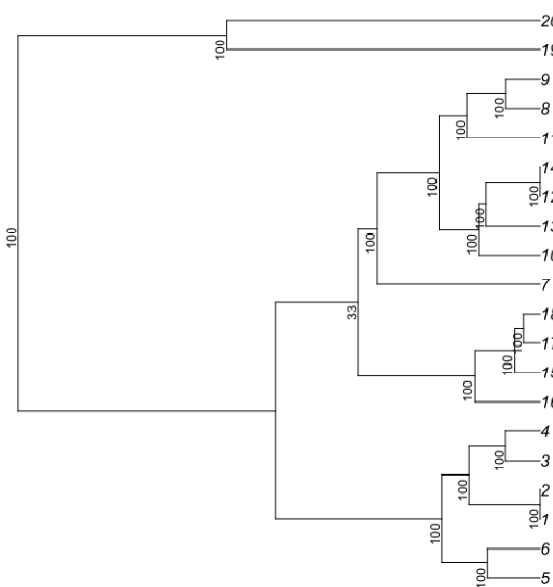

C

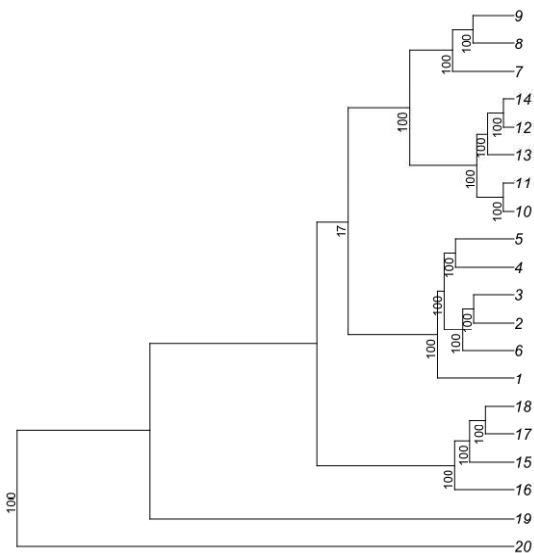

D

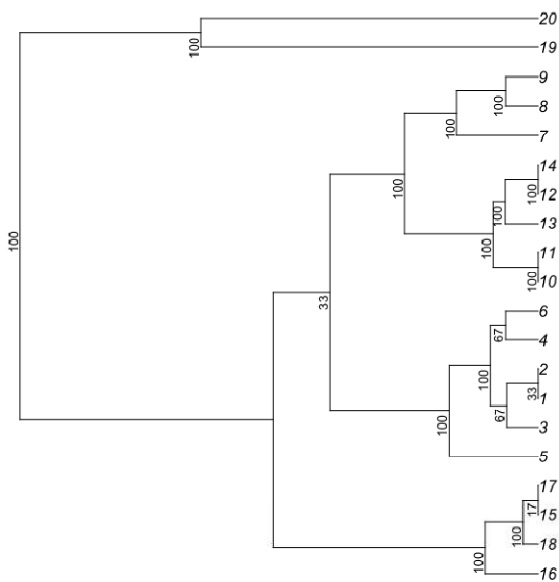

E

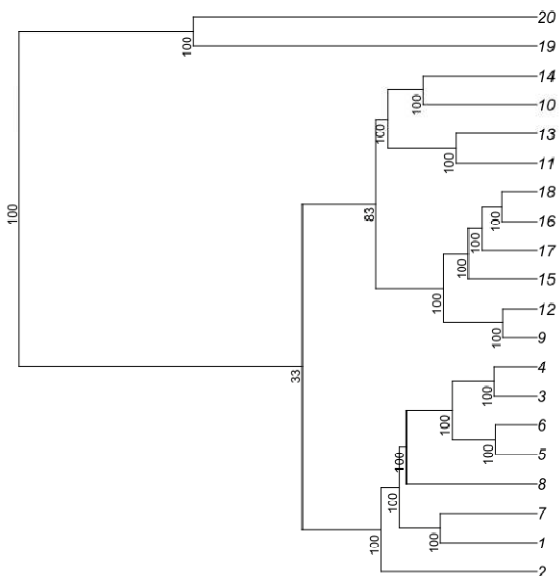

F

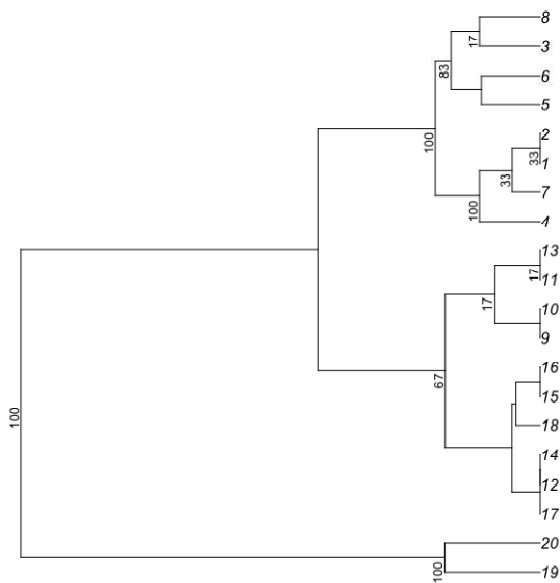

Supplement: s1 [file s1]
